# Supplementary material for: Clinical and molecular features of 40 Chinese patients with idiopathic hypogonadotropic hypogonadism
Source: PubMed Central journal article supplement — Transl Androl Urol. 2023 Aug 21;12(9):1397–407. doi: 10.21037/tau-23-225 (PMC10560348; doi:10.21037/tau-23-225), 2023-08-21
Supplement: tau-12-09-1397-dss.pdf [file tau-12-09-1397-dss.pdf]

## Data Sharing Statement

|                     |                                                                                                                                                     |                                                                                                                            |
|---------------------|-----------------------------------------------------------------------------------------------------------------------------------------------------|----------------------------------------------------------------------------------------------------------------------------|
| <b>Article Info</b> | <a href="https://dx.doi.org/10.21037/tau-23-225">https://dx.doi.org/10.21037/tau-23-225</a>                                                         |                                                                                                                            |
| <b>Item</b>         | <b>Question</b>                                                                                                                                     | <b>Authors' Response<br/>(place "-" if not applicable)</b>                                                                 |
| 1                   | Would you like to share data collected for your study to others?                                                                                    | Yes                                                                                                                        |
| 2                   | If not, would you like to share the reason for your decision?                                                                                       | -                                                                                                                          |
| 3                   | What data in particular will be shared?                                                                                                             | The data sets generated and analyzed during our study are available at the reasonable request of the corresponding author. |
| 4                   | Any other documents will be shared? Such as study protocol, statistical analysis plan, informed consent form, clinical study report, analytic code. | Statistical analysis plan, informed consent form, and clinical study report will also be shared if requested.              |
| 5                   | When will data availability begin?                                                                                                                  | From the publication date.                                                                                                 |
| 6                   | When will data availability end?                                                                                                                    | Two years within the publication date, since the technique or survival data may be updated over time.                      |
| 7                   | To whom will you share the data?                                                                                                                    | Medical andrology and urology surgeons who are interested in studies of nIHH.                                              |
| 8                   | For what type of analysis or purpose?                                                                                                               | For analysis to evaluate the safety of nIHH in Patients.                                                                   |
| 9                   | How or where can the data/documents be obtained?                                                                                                    | Emails could be sent to the address below to obtain the shared data: xinyixia@163.com                                      |
| 10                  | Any other restrictions?                                                                                                                             | We may balance the potential benefits and risks for each request and then provide the data that could be shared.           |
