# Supplementary material for: Clinical and molecular features of 40 Chinese patients with idiopathic hypogonadotropic hypogonadism
Source: PubMed Central journal article supplement — Transl Androl Urol. 2023 Aug 21;12(9):1397–407. doi: 10.21037/tau-23-225 (PMC10560348; doi:10.21037/tau-23-225), 2023-08-21
Supplement: tau-12-09-1397-supplementary.pdf [file tau-12-09-1397-supplementary.pdf]

## Supplementary

**Table S1** The primer information for Sanger sequencing to verify mutations

| Patient | Variant                                                                            | Primer length (bp) | Product size (bp) | T <sub>m</sub> (°C) | Primer sequence           |
|---------|------------------------------------------------------------------------------------|--------------------|-------------------|---------------------|---------------------------|
| 1       | SEMA3E: Exon9,c.967C>T, p.P323S                                                    | 23                 | 522               | 58.1                | F:AGTGTCTGGTTCCTTCCTATTGT |
|         |                                                                                    | 22                 |                   |                     | R:CACAGGAGGATTCTGGGTA     |
| 2       | FGFR1:Exon15,c.1981C>T, p.R661X                                                    | 20                 | 421               | 55.5                | F:GGGACATTCACCACATCGAC    |
|         |                                                                                    | 20                 |                   |                     | R:GCCTTTCAACATCTGGAGCA    |
| 3       | KISS1R: Exon5,c.991C>T, p.R331X                                                    | 20                 | 496               | 57.3                | F:AGCCTTTCGTCTAACCACCT    |
|         |                                                                                    | 18                 |                   |                     | R:TCAGAGAGGGGCGTTGTC      |
| 4       | SOX10: Exon4,c.1287delG,p.S431Rfs*69                                               | 19                 | 622               | 56.6                | F:CCAAAGCCCAGGTGAAGAC     |
|         |                                                                                    | 20                 |                   |                     | R:GGCAGTGAGCCAGACAGAAA    |
| 5       | ANOS1: Exon6,c.844delC,p.R282Vfs*26                                                | 20                 | 417               | 55.5                | F:TGTTCCCTGACAGCTCTCTT    |
|         |                                                                                    | 20                 |                   |                     | R:GCAAAGCCACCTGTTGACTA    |
| 6       | ANOS1: Exon13,c.1886_1887insCTACTCT, p.R631Sfs*36                                  | 20                 | 478               | 58.1                | F:CTAGGCTCTCTGTGCATTGC    |
|         |                                                                                    | 20                 |                   |                     | R:AAGAAAGGGAGAAAAGCGGG    |
| 7       | FGFR1:Exon16, c.2117_2118insT, p.E705Gfs*16                                        | 20                 | 696               | 58.7                | F:TGCTTTCCTCGGACTGAG      |
|         |                                                                                    | 20                 |                   |                     | R:GTA                     |
| 8       | FGFR1:Exon17, c.2239_2255delTTCAAGCAGCTGGTGA, p.F745Rfs*45                         | 20                 | 673               | 60.6                | F:ATTTGCAGGTGGTCTTTTCGG   |
|         |                                                                                    | 18                 |                   |                     | R:CAGTCAGCGGCGTTTGAG      |
| 9       | CHD7: Exon29, c.5695_5698delGGCC, c.5700_5707delACTTT ACT, p.G1899R,Q1900_W1903del | 19                 | 617               | 56.6                | F:AAATGAGGGCACTGAGATG     |
|         |                                                                                    | 20                 |                   |                     | R:TTGTCCACCTGTTAGAAAGA    |
| 10      | CHD7:Exon25, c.5355G>T, p.W1785C                                                   | 21                 | 667               | 55.5                | F:AGCACTGGTGTCTGAGATGA    |
|         |                                                                                    | 20                 |                   |                     | R:CACTGGTTGGCAGAGTTAGC    |
| 11      | PROKR2: Exon2, c.667T>G, p.Y223D,c.892C>T, p.R298C                                 | 20                 | 862               | 57.3                | F:TGAGGATCACTGTGCCACT     |
|         |                                                                                    | 20                 |                   |                     | R:TTGATGGTGGGTGATGCTCT    |
| 12      | KISS1R: Exon2, c.309C>A, p.Y103X                                                   | 20                 | 549               | 57.3                | F:CGGAGGCGTAATGTTGAGA     |
|         |                                                                                    | 18                 |                   |                     | R:GTGCATCTCCCTCCGTCC      |

T<sub>m</sub>, Melting Temperature.
